# Supplementary material for: Intoxication due to Δ9-tetrahydrocannabinol is characterized by disrupted prefrontal cortex activity
Source: Springer Nature journal article supplement (doi:10.1038/s41386-024-01876-5), 2024-05-07
Supplement: MOESM1 [file 41386_2024_1876_MOESM1_ESM.pdf]

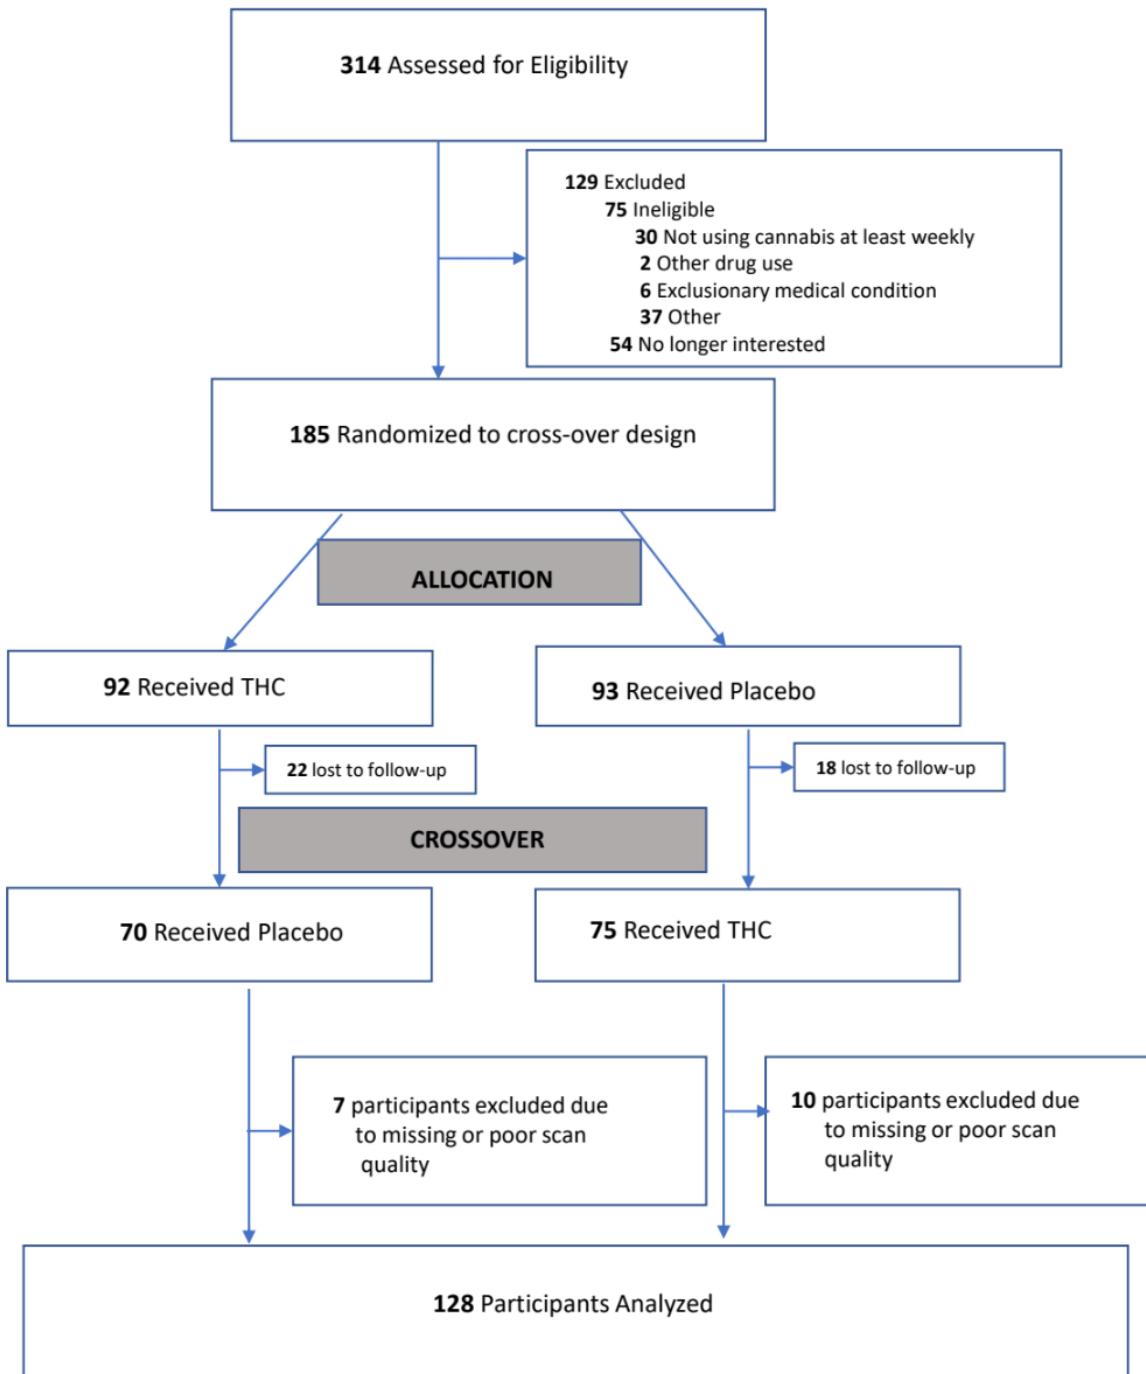

Supplementary Figure 1: CONSORT Flow Diagram

**Table 1. Characteristics of study participants (N = 128)**

| <b>Characteristic</b>                            | <b>Mean (SD)</b> |
|--------------------------------------------------|------------------|
| <b>Age</b>                                       | 25.4 (6.4)       |
| <b>Sex</b>                                       |                  |
| <i>Female</i>                                    | 48.4% (62.0)     |
| <b>Race</b>                                      |                  |
| <i>American Indian or Alaska Native</i>          | 0.8% (1.0)       |
| <i>Asian</i>                                     | 7.3% (9.0)       |
| <i>Black or African American</i>                 | 8.1% (10.0)      |
| <i>Native Hawaiian or Other Pacific Islander</i> | 0.0% (0.0)       |
| <i>White</i>                                     | 74.8% (92.0)     |
| <i>More than one race</i>                        | 8.9% (11.0)      |
| <b>Ethnicity</b>                                 |                  |
| <i>Hispanic</i>                                  | 22.4% (28.0)     |
| <i>Non-Hispanic</i>                              | 77.6% (97.0)     |
| <b>Years of Education</b>                        | 15.3 (2.1)       |
| <b>Age of First Regular Use</b>                  | 19.3 (4.1)       |
| <b>Cannabis Use Frequency</b>                    |                  |
| <i>One or two days per week</i>                  | 7.0% (9.0)       |
| <i>Three to five days per week</i>               | 36.7% (47.0)     |
| <i>Six days per week or more</i>                 | 56.2% (72.0)     |
| <b>Cannabis Use Occasions Per Day</b>            |                  |
| <i>Multiple times per day</i>                    | 63.1% (77.0)     |
| <i>No more than once per day</i>                 | 36.9% (45.0)     |
| <b>Urine THC-COOH Concentration (ng/mL)</b>      | 238.5 (441.6)    |

**Table 2. Channel Connections with Significant Effects in dRSFC Variability**

|   | Channel Connection | p-value | Partial $\eta_p^2$ | 95% CI of partial eta-squared |
|---|--------------------|---------|--------------------|-------------------------------|
| 1 | 1-12               | 0.0006  | 0.089              | [0.017,0.191]                 |
| 2 | 6-10               | 0.0012  | 0.080              | [0.013,0.180]                 |
| 3 | 8-10               | 0.0006  | 0.088              | [0.016,0.190]                 |
| 4 | 8-14               | 0.0001  | 0.108              | [0.027,0.215]                 |
| 5 | 8-15               | 0.0003  | 0.098              | [0.021,0.203]                 |
| 6 | 15-19              | 0.0015  | 0.077              | [0.012,0.177]                 |

Summary of repeated measures ANOVA comparing dRSFC variability pre- and post- placebo and THC at FDR- $p < 0.05$ . Uncorrected- $p$  value, partial eta-squared and its 95% CI are provided for channels that survived FDR-based multiple correction at alpha of 0.05.

*Pre-Post Median HbO in THC  
(Normalized to Placebo)*

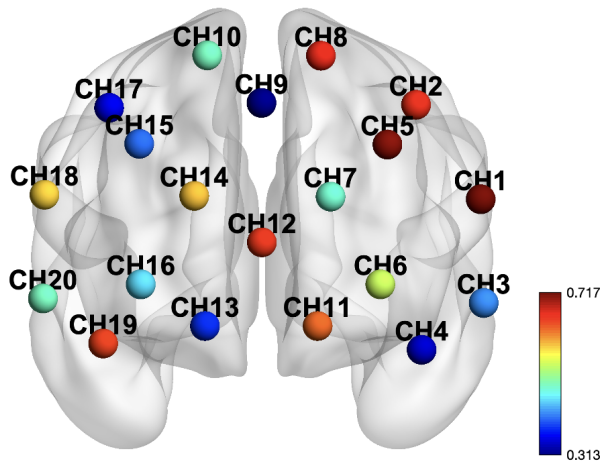

*Pre-Post Median HbO in Placebo  
(Normalized to Placebo)*

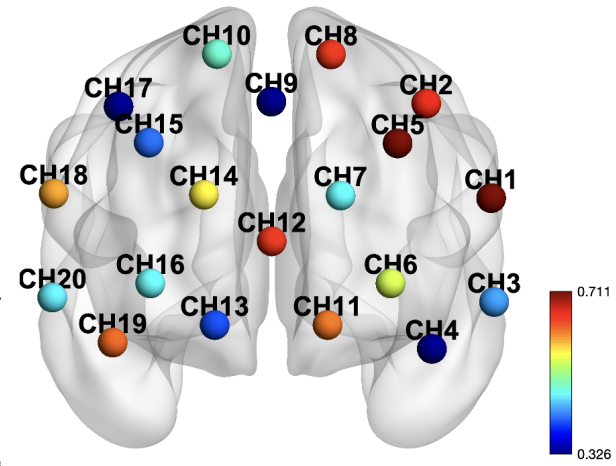

**Supplementary Figure 2: Brain map of the median  $\Delta$ HbO concentration before vs. after the drug (in %) normalized to the placebo data.** No significant differences were observed between the placebo and THC conditions globally (all channels combined) nor at the individual channel level. We performed this by a) computing the median  $\Delta$ HbO concentration over the 6-minute duration, b) calculating  $\Delta$ (pre-post) for placebo and drug, c) normalizing placebo data to 0 to 100%, and (d) normalizing THC data to placebo data. As shown, the median  $\Delta$ HbO concentration did not differ between post-placebo and post-THC states. The color bar represents the % of median group-level  $\Delta$ HbO concentration across the various channels.
